# Supplementary material
Source: PubMed Central journal article supplement (PMC6825263)
Supplement: pnas.1909844116.sapp.pdf [file pnas.1909844116.sapp.pdf]

# PNAS

[www.pnas.org](http://www.pnas.org)

Supplementary Information for

*Multi-layered horizontal operon transfers from bacteria reconstruct a thiamine salvage pathway in yeasts*

Carla Gonçalves and Paula Gonçalves\*

\*corresponding author

Email: [pmz@fct.unl.pt](mailto:pmz@fct.unl.pt)

**This PDF file includes:**

Supplementary text: Methods for the construction of preliminary phylogenies  
Figures S1 to S6  
Tables S1 to S4  
SI References

**Other supplementary materials for this manuscript include the following:**

Datasets S1 to S3  
Phylogenetic analyses related files can be accessed in Figshare (DOI:  
[10.6084/m9.figshare.9800636](https://doi.org/10.6084/m9.figshare.9800636))

## Methods for the construction of preliminary phylogenies presented in Figure S2 and S5.

For the preliminary phylogenies presented in Figure S2, the top 5.000 BLASTp hits on NCBI (Refseq database) were selected using *St. bombicola* proteins as queries and an *e-value* cut off of  $1e^{-10}$ . *tenA*, *thiD*, *thiE* and *thiM* (recovered as *thiEM* because these genes are fused in all W/S-clade species) sequences from other W/S-clade species were retrieved by tBLASTx in local genome databases and the proteins were subsequently predicted in *AUGUSTUS* (web interface) using *Saccharomyces cerevisiae* as reference. Sequences with more than 95% similarity were removed with *CD-HIT* v4.6.7 (1) and the remaining sequences were aligned with *MAFFT* v7.222 (2) using an iterative refinement method (L-INS-i). For *TenA*, *ThiD*, *ThiE* and *ThiM*, poorly aligned sequences were removed with *trimAl* v1.2 (3) using its “gappyout” option. For the alignment comprising the fused *ThiEM* protein which encodes the *ThiE* and *ThiM* domains, columns with gaps in more than 10% of the sequences were removed (-gt 0.9). If this strategy removed more than 40% of the columns in the original alignment, at least 60% were conserved by adding the necessary number of columns in decreasing order of scores (-cons 60). In this way it was ensured that both *ThiE* and *ThiM* portions were conserved in the alignment. Phylogenies were constructed in *IQ-TREE* v1.6.10 (4) with 1.000 ultrafast bootstrap (5) replicates and with selection of the best fitting model. In all cases, W/S-clade sequences grouped with bacteria in the preliminary phylogenies and *W. galacta* groups with different bacteria than other W/S-clade species, suggesting an independent origin.

For the preliminary phylogeny of *YlmB* presented in Figure S5A, the top 5.000 BLASTp hits on NCBI (Refseq database) were selected using *St. bombicola* putative *YlmB* as query and an *e-value* cutoff of  $1e^{-10}$ . Sequences with more than 95% similarity were removed with *CD-HIT* v4.6.7 (1) and the remaining sequences were aligned with *MAFFT* v7.222 (2) using an iterative refinement method (L-INS-i). For the final phylogeny presented in Figure S5B, only the top 750 hits in UniprotKB (reference\_proteomes) were selected with the addition of the closest related hits in *Bacillus subtilis* which include the characterized *YlmB* protein (6). Sequences with more than 98% similarity were removed with *CD-HIT* v4.6.7 (1) and the remaining sequences were aligned with *MAFFT* v7.222 (2) using an iterative refinement method (L-INS-i). Phylogenies were constructed in *IQ-TREE* v1.6.10 (4) with 1.000 ultrafast bootstrap (5) replicates and with the selection of best fitting model.

Supplementary figures

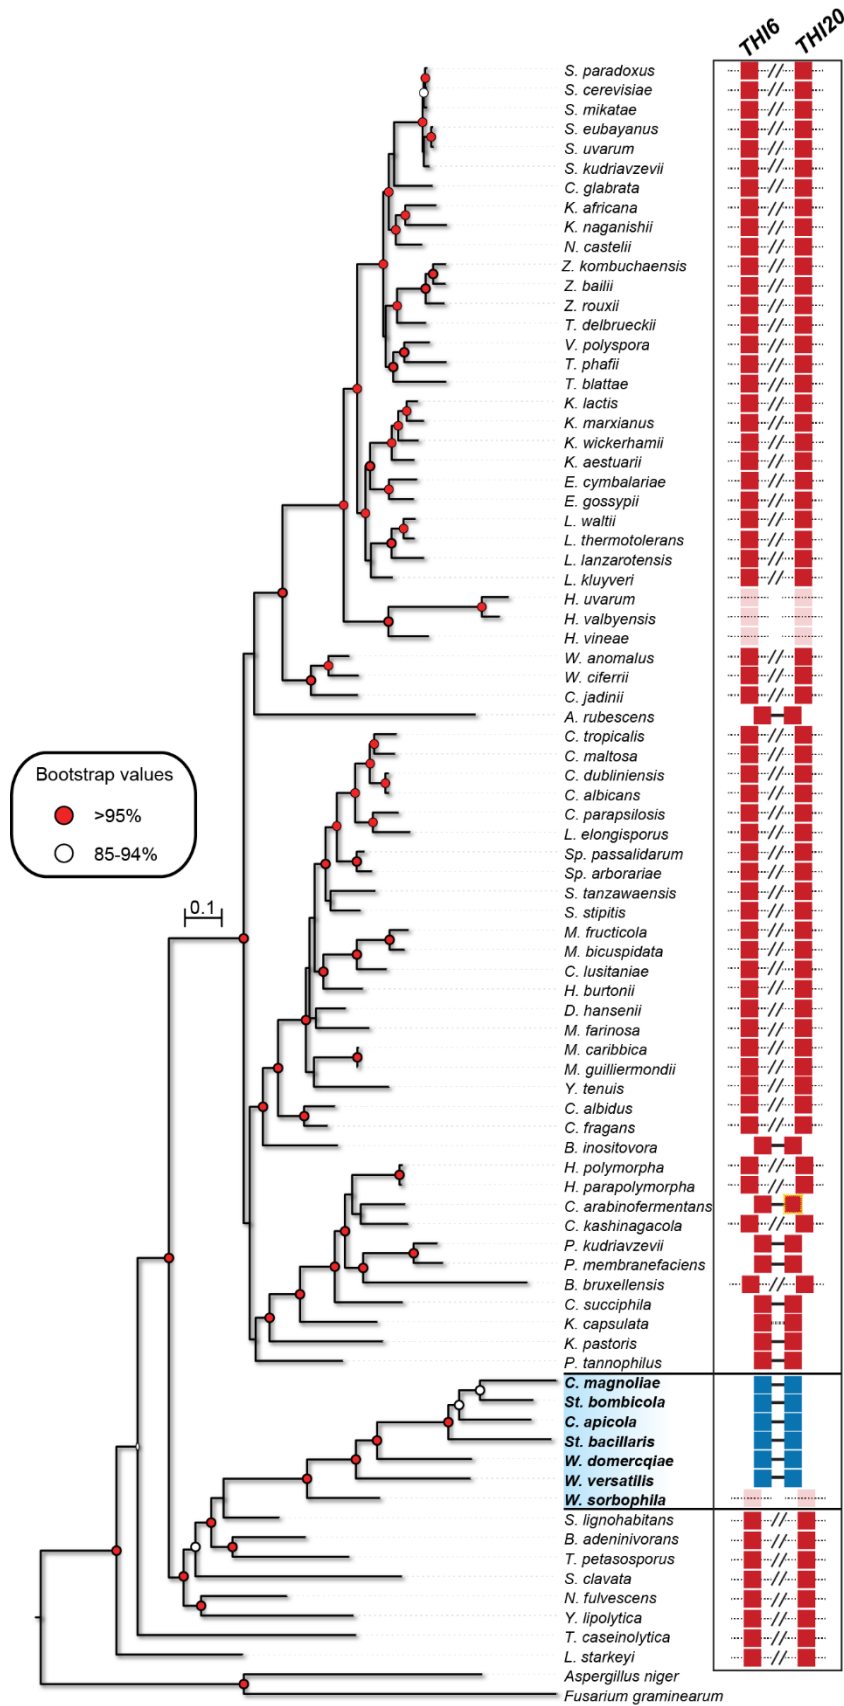

**Fig. S1. Distribution of TH16 and TH20 homologues in the Saccharomycotina.** The maximum likelihood (ML) tree is the one depicted in Gonçalves C. et al., 2018 (7). A tBLASTx in local genome databases (see Table S4, which includes the respective accession numbers) was performed ( $E$ -value <  $e^{-3}$ ). A BLASTp in

NCBI was performed with the top hits and whenever the top BLASTp hits corresponded to the identity of the query gene, the gene was considered as being present. Physical linkage was asserted by inspecting if the top hits for *THI6* and *THI20* were contiguously located. The red and blue squares represent homologues of fungal origin (top BLASTp hits corresponded to fungal proteins) and bacterial origin (top BLASTp hits corresponded to bacterial proteins), respectively. Faded squares denote absent genes ( $e\text{-value} > e^{-3}$ ). Physical linkage between *THI6* and *THI20* is represented by a black line linking the two squares while “//” means that the genes are distantly located in the respective genome. For *Candida arabinofementans* several paralogues of *THI20* were detected and one of the paralogues is in cluster with *THI6* while the others are located in other genomic regions. In *Kuraishia capsulata* *THI6* and *THI20* are separated by three genes.

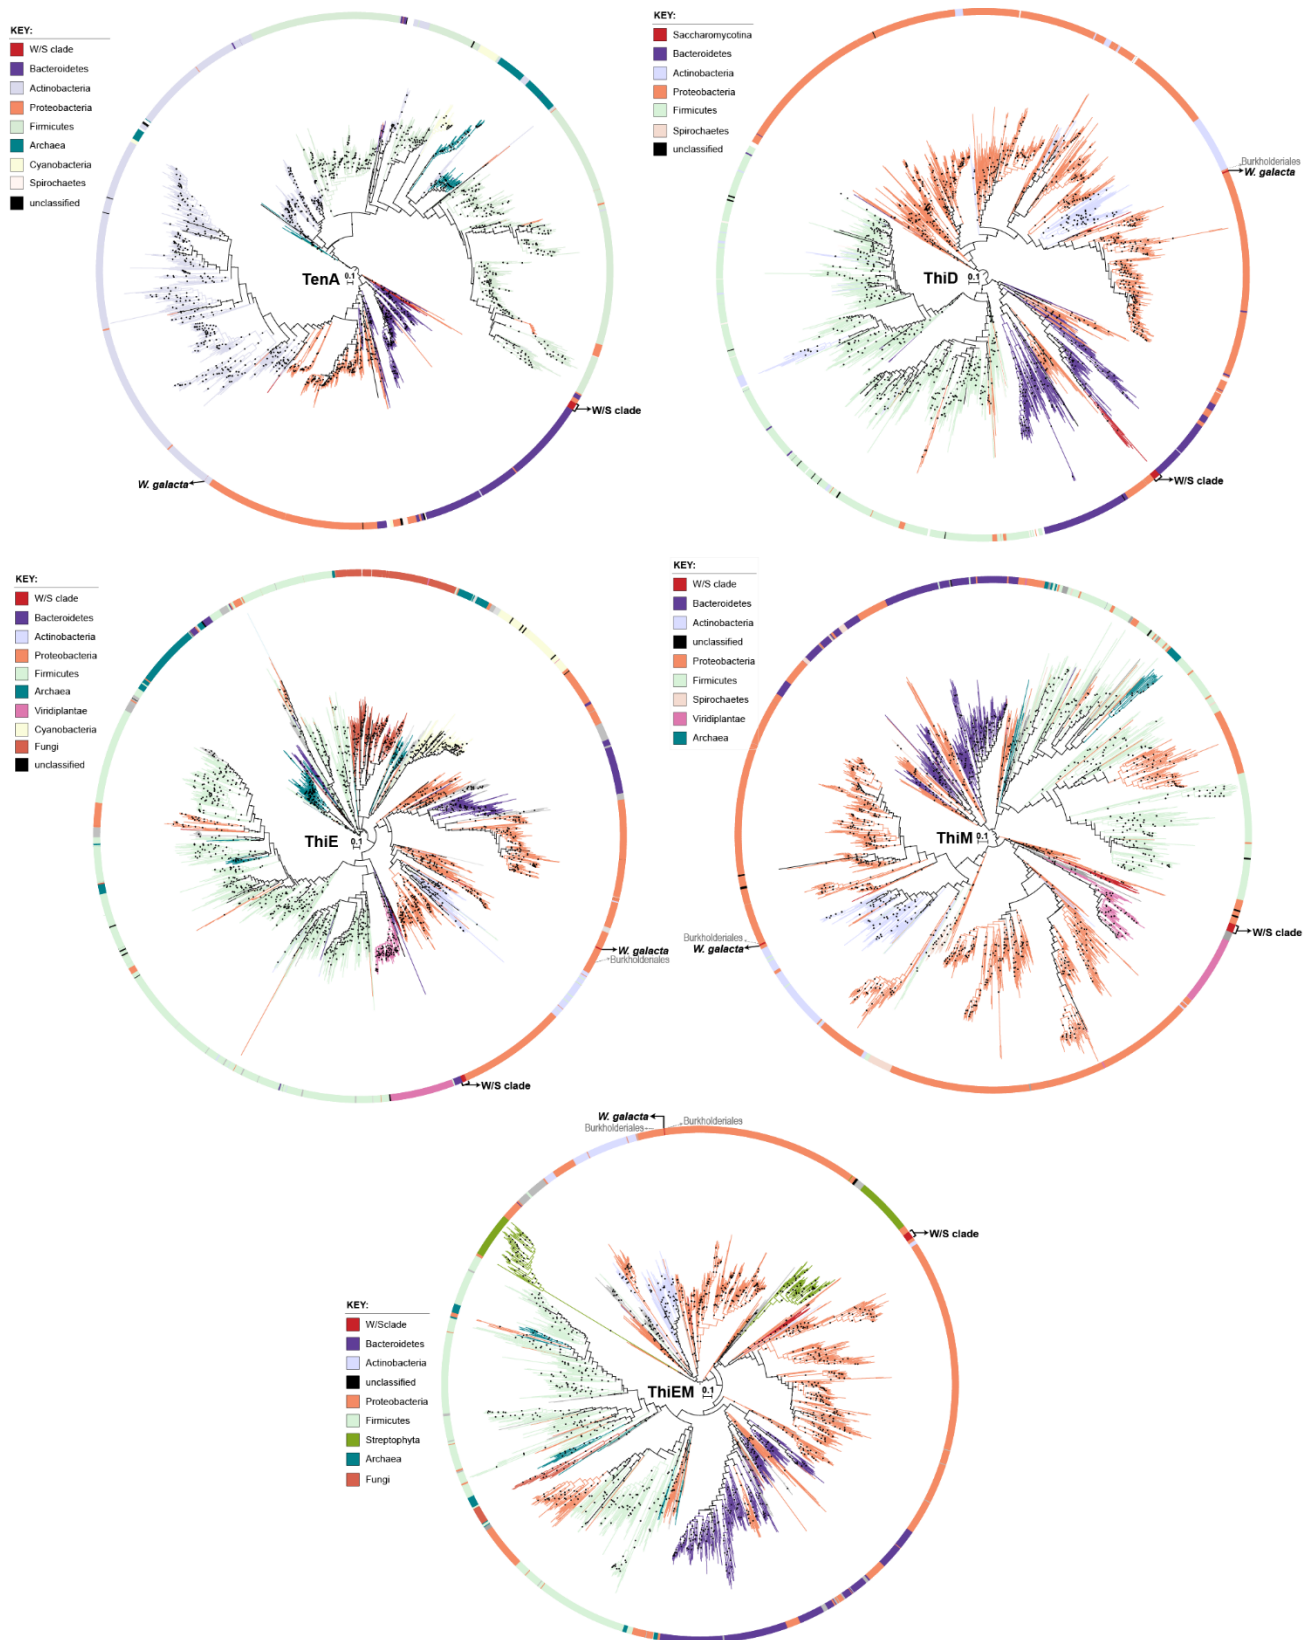

**Fig. S2. Preliminary phylogenies of Thi proteins.** The top 5,000 hits on NCBI (Refseq database) were selected using *St. bombycolina* proteins as queries. Taxonomic classification (Phylum for Bacteria and Kingdom/Domain for other organisms) was automatically assigned using a customized *E*-utilities script provided by Entrez Direct and is presented in the key on the left next to the respective phylogenetic tree.

Lineages with less than 20 representatives are colored in grey. All phylogenies were midpoint rooted and visualized in iTOL v4 (8).

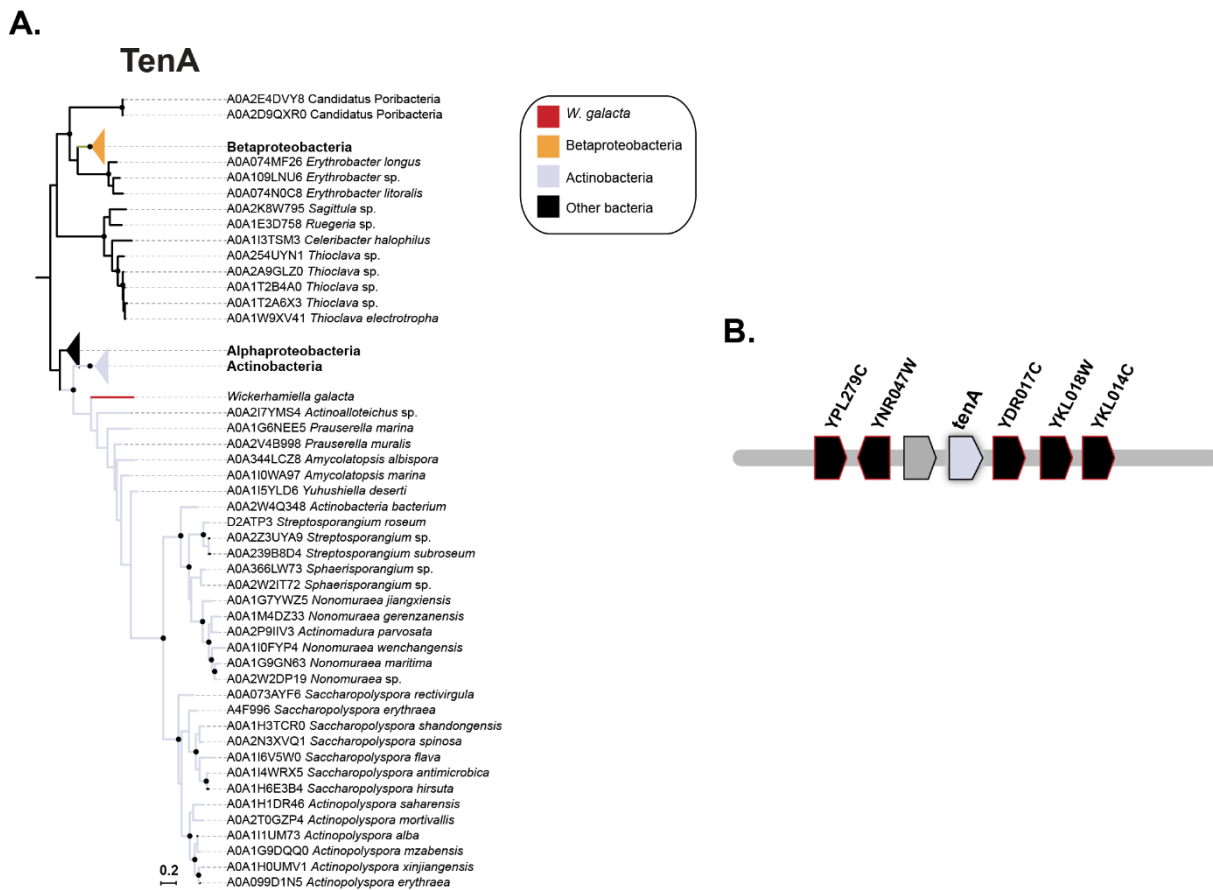

**Fig. S3. Maximum likelihood phylogeny of proteins closely related to TenA from *W. galacta*.** (A) Phylogeny constructed with the top 750 BLASTp hits in UniprotKB. Branches with support higher than 95% (ultrafast bootstrap) are indicated by black circles. (B) Gene organization in the vicinity of *tenA* from *W. galacta*. Genes are represented by arrows denoting relative transcriptional direction. Genes from fungal origin are outlined in red while genes with dubious annotations are represented in grey. The closest related genes in *S. cerevisiae* are shown on top of the arrows.

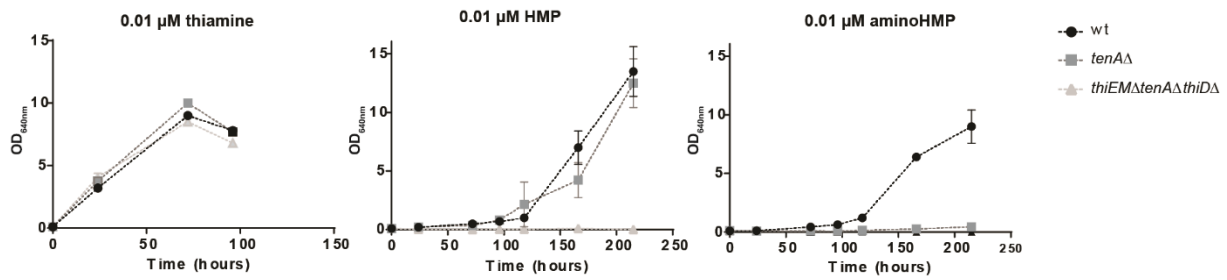

**Fig. S4.** Growth curves for wt and *THI* deletion mutants (*tenAΔ* and *thiEMΔtenAΔthiDΔ*) grown in YNB medium without aminoacids and without thiamine supplemented with 0.01 μM of thiamine, 0.01 μM of HMP or 0.01 μM of aminoHMP, as indicated. Cultures were pre-grown in the respective media for one to four days (depending on the lag-phase) until late exponential phase was reached and were subsequently inoculated in the same medium to an OD<sub>640nm</sub> of 0.2. Growth was monitored for 220 hours at 30°C with shaking (180 r.p.m.).



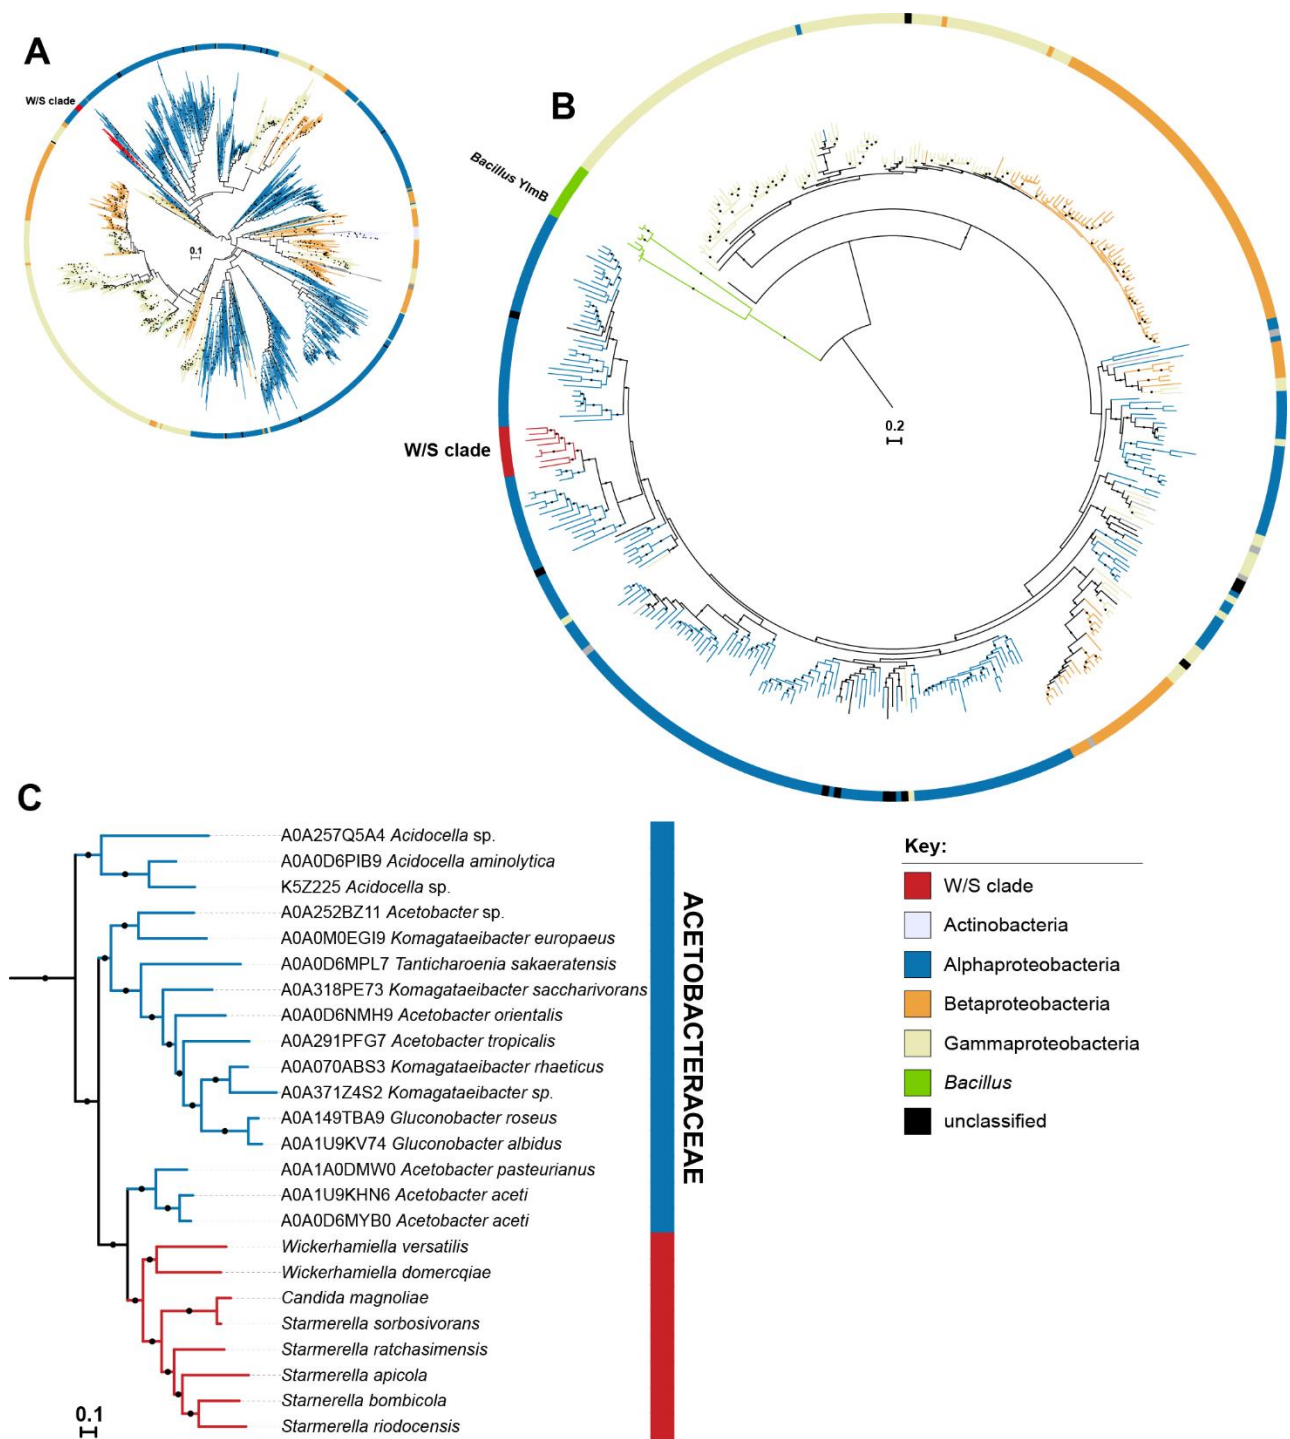

**Fig. S5. Maximum likelihood phylogeny of proteins closely related to putative YlmB from W/S-clade species. (A)** Preliminary phylogeny constructed with the top 5,000 hits to putative YlmB from *St. bombicola*. Complete **(B)** and pruned **(C)** ML phylogeny constructed with the top 750 hits to putative YlmB from *St. bombicola* with the addition of functionally characterized YlmB proteins from *Bacillus subtilis* (indicated in green). Branches with support higher than 95% (ultrafast bootstrap) are indicated by black dots. Phylogenies were midpoint rooted and visualized in iTOL v4 (8) and branches are colored according to the taxonomic classification as indicated in the key.

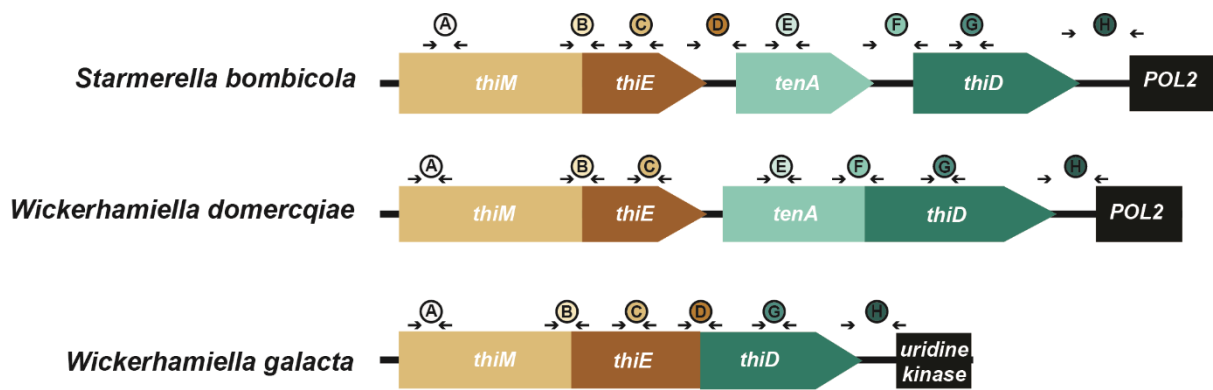

**Fig. S6.** Primer pairs used for RT-qPCR. Primer sequences and efficiencies are shown in Table S3.

## Supplementary Tables

**Table S1. Complete list of fungal taxa, abbreviated species names and genome databases and accession numbers of RNA polymerase proteins used to construct the species tree (Figure 1A and Figure S1).** Abbreviated species names are given for each species as used in the phylogeny. W/S-clade species are highlighted in blue. Species used as outgroups are highlighted in orange.

| Species                                                   | Abbreviated names             | Strain(s)        | Genome database |
|-----------------------------------------------------------|-------------------------------|------------------|-----------------|
| <i>Aspergillus niger</i>                                  | <i>A. niger</i>               | CBS 513.88       | BROAD/JGI       |
| <i>Fusarium graminearum</i><br>( <i>Gibberella zeae</i> ) | <i>F. graminearum</i>         | PH-1             | SGD/BROAD       |
| <i>Blastobotrys adenivorans</i>                           | <i>B. adenivorans</i>         |                  | NCBI            |
| <i>Ascoidea rubescens</i>                                 | <i>A. rubescens</i>           | NRRL Y17699      | JGI             |
| <i>Babjeviella inositovora</i>                            | <i>A. inositovora</i>         | NRRL Y-12698     | JGI             |
| <i>Candida tenuis</i>                                     | <i>C. tenuis</i>              | NRRL Y-1498      | JGI             |
| <i>Candida albicans</i>                                   | <i>C. albicans</i>            | WO-1             | SGD/BROAD       |
| [ <i>Candida</i> ] <i>apicola</i>                         | <i>C. apicola</i>             | NRLL Y-50540     | NCBI            |
| <i>Candida arabinof fermentans</i>                        | <i>C. arabinof fermentans</i> | NRRL YB-2248     | JGI             |
| <i>Candida caseinolytica</i>                              | <i>C. caseinolytica</i>       | NRRL Y-17796     | JGI             |
| <i>Candida dubliniensis</i>                               | <i>C. dubliniensis</i>        | CD36             | SGD/YGOB        |
| <i>Candida glabrata</i>                                   | <i>C. glabrata</i>            | CBS 138          | SGD/YGOB        |
| [ <i>Candida</i> ] <i>magnoliae</i>                       | <i>C. magnoliae</i>           | PYCC 2903        | NCBI            |
| <i>Candida parapsilosis</i>                               | <i>C. parapsilosis</i>        | CDC317           | BROAD/NCBI      |
| <i>Candida tanzawaensis</i>                               | <i>C. tanzawaensis</i>        | NRRL Y-17324     | JGI             |
| <i>Candida tropicalis</i>                                 | <i>C. tropicalis</i>          | MYA-3404         | SGD/BROAD       |
| <i>Clavispora lusitaniae</i>                              | <i>C. lusitaniae</i>          | ATCC 42720       | BROAD/NCBI      |
| <i>Cyberlindnera jadinii</i>                              | <i>C. jadinii</i>             | NBRC 0988        | NCBI            |
| <i>Debaryomyces hansenii</i>                              | <i>D. hansenii</i>            | CBS767           | SGD/NCBI        |
| <i>Dekkera bruxellensis</i>                               | <i>D. bruxellensis</i>        | AWRI1499         | NCBI            |
| <i>Eremothecium cymbalariae</i>                           | <i>E. cymbalariae</i>         | DBVPG#7215       | NCBI/YGOB       |
| <i>Eremothecium gossypii</i>                              | <i>E. gossypii</i>            | ATCC 10895       | SGD/NCBI        |
| <i>Hyphopichia burtonii</i>                               | <i>H. burtonii</i>            | NRRL Y-1933      | JGI             |
| <i>Kazachstania africana</i>                              | <i>K. africana</i>            | CBS 2517         | YGOB            |
| <i>Kazachstania naganishii</i>                            | <i>K. naganishii</i>          | CBS 8797         | YGOB            |
| <i>Kluyveromyces aestuarii</i>                            | <i>K. aestuarii</i>           | ATCC 18862       | NCBI            |
| <i>Kluyveromyces lactis</i>                               | <i>K. lactis</i>              | NRRL Y-1140      | SGD/YGOB        |
| <i>Kluyveromyces wickerhamii</i>                          | <i>K. wickerhamii</i>         | UCD 54-210       | NCBI            |
| <i>Komagataella pastoris</i>                              | <i>K. pastoris</i>            | GS115 + CBS 7435 | SGD/NCBI        |
| <i>Lachancea kluyveri</i>                                 | <i>L. kluyveri</i>            | NRRL Y-12651     | SGD/YGOB        |
| <i>Lachancea thermotolerans</i>                           | <i>L. thermotolerans</i>      | CBS 6340         | SGD/YGOB        |
| <i>Lachancea waltii</i>                                   | <i>L. waltii</i>              | NCYC 2644        | SGD/YGOB        |
| <i>Lipomyces starkeyi</i>                                 | <i>L. starkeyi</i>            | NRRL Y-11557     | JGI             |
| <i>Lodderomyces elongisporus</i>                          | <i>L. elongisporus</i>        | NRRL YB-4239     | BROAD/NCBI      |
| <i>Metschnikowia bicuspidata</i>                          | <i>M. bicuspidata</i>         | NRRL YB-4993     | JGI             |
| <i>Meyerozyma guilliermondii</i>                          | <i>M. guilliermondii</i>      | ATCC 6260        | BROAD/NCBI      |
| <i>Millerozyma farinosa</i>                               | <i>M. farinosa</i>            | CBS 7064         | SGD/NCBI        |

| Species                                         | Abbreviated names         | Strain(s)       | Genome database          |
|-------------------------------------------------|---------------------------|-----------------|--------------------------|
| <i>Nadsonia fulvescens</i> var. <i>elongata</i> | <i>N. fulvescens</i>      | DSM 6958        | JGI                      |
| <i>Naumovozyma castellii</i>                    | <i>N. castellii</i>       | CBS 4309        | YGOB                     |
| <i>Ogataea polymorpha</i>                       | <i>O. polymorpha</i>      | NCYC 495 leu1.1 | JGI                      |
| <i>Ogataea parapolyomorpha</i>                  | <i>O. parapolyomorpha</i> | DL-1            | NCBI                     |
| <i>Pachysolen tannophilus</i>                   | <i>P. tannophilus</i>     | NRRL Y-2460     | JGI/NCBI                 |
| <i>Pichia kudriavzevii</i>                      | <i>P. kudriavzevii</i>    | M12             | NCBI                     |
| <i>Pichia membranifaciens</i>                   | <i>P. membranifaciens</i> | NRRL Y-2026     | JGI                      |
| <i>Saccharomyces cerevisiae</i>                 | <i>S. cerevisiae</i>      | S288c           | SGD/BROAD                |
| <i>Saccharomyces eubayanus</i>                  | <i>S. eubayanus</i>       | FM1318          | NCBI                     |
| <i>Saccharomyces kudriavzevii</i>               | <i>S. kudriavzevii</i>    | IFO 1802        | SSS Website              |
| <i>Saccharomyces mikatae</i>                    | <i>S. mikatae</i>         | IFO 1815        | SSS Website<br>SGD/BROAD |
| <i>Saccharomyces paradoxus</i>                  | <i>S. paradoxus</i>       | NRRL Y-17217    | SSS Website<br>NCBI      |
| <i>Saccharomyces uvarum</i>                     | <i>S. uvarum</i>          | CBS 7001        | SSS Website<br>SGD/BROAD |
| <i>Saprochaete clavata</i>                      | <i>Sa. clavata</i>        | CNRMA 12.647    | NCBI                     |
| <i>Scheffersomyces stipitis</i>                 | <i>S. stipitis</i>        | CBS 6054        | JGI/NCBI                 |
| <i>Spathaspora passalidarum</i>                 | <i>S. passalidarum</i>    | NRRL Y-27907    | JGI/NCBI                 |
| <i>Starmerella bacillaris</i>                   | <i>St. bacillaris</i>     | PYCC 3044       | NCBI                     |
| <i>Starmerella riodocensis</i>                  | <i>St. riodocensis</i>    | NRRL Y-27859    | NCBI (Y1000+ project)    |
| <i>Starmerella ratchamatensis</i>               | <i>St. ratchamatensis</i> | CBS 10611       | NCBI (Y1000+ project)    |
| <i>Starmerella sorbosivorans</i>                | <i>St. sorbosivorans</i>  | CBS 8768        | NCBI (Y1000+ project)    |
| <i>Starmerella bombicola</i>                    | <i>St. bombicola</i>      | PYCC 5882       | NCBI                     |
| <i>Sugiyamaella lignohabitans</i>               | <i>Su. lignohabitans</i>  | NRRL YB-1473    | NCBI                     |
| <i>Tetrapispora blatae</i>                      | <i>T. blatae</i>          | CBS 6284        | YGOB                     |
| <i>Tetrapispora phaffii</i>                     | <i>T. phaffii</i>         | CBS 4417        | YGOB                     |
| <i>Torulaspora delbrueckii</i>                  | <i>T. delbrueckii</i>     | CBS 1146        | YGOB                     |
| <i>Trichomonascus petasosporus</i>              | <i>T. petasosporus</i>    | NRRL YB-2093    | JGI                      |
| <i>Vanderwaltozyma polyspora</i>                | <i>V. polyspora</i>       | DSM 70294       | YGOB/NCBI                |
| <i>Wickerhamiella domercqiae</i>                | <i>W. domercqiae</i>      | PYCC 3067       | NCBI                     |
| <i>Wickerhamiella cacticola</i>                 | <i>W. cacticola</i>       | NRRL Y-27362    | NCBI (Y1000+ project)    |
| <i>Wickerhamiella hasegawae</i>                 | <i>W. hasegawae</i>       | JCM 12559       | NCBI (Y1000+ project)    |
| <i>Wickerhamiella galacta</i>                   | <i>W. galacta</i>         | NRRL Y-17645    | NCBI (Y1000+ project)    |
| <i>Wickerhamiella occidentalis</i>              | <i>W. occidentalis</i>    | NRRL Y-27364    | NCBI (Y1000+ project)    |
| <i>Wickerhamiella pararugosa</i>                | <i>W. pararugosa</i>      | NRRL Y-17089    | NCBI (Y1000+ project)    |
| <i>Wickerhamiella versatilis</i>                | <i>W. versatilis</i>      | JCM 5958        | RIKEN                    |
| <i>Wickerhamomyces anomalus</i>                 | <i>W. anomalus</i>        | NRRL Y-366      | JGI                      |
| <i>Yarrowia lipolytica</i>                      | <i>Y. lipolytica</i>      | CLIB 122        | SGD/NCBI                 |
| <i>Zygosaccharomyces bailii</i>                 | <i>Z. bailii</i>          | CLIB 213        | NCBI                     |
| <i>Zygosaccharomyces kombuchaensis</i>          | <i>Z. kombuchaensis</i>   | CBS 8849        | Local database           |
| <i>Zygosaccharomyces rouxii</i>                 | <i>Z. rouxii</i>          | CBS 732         | SGD/JGI                  |

**Table S2. Information concerning strains and genome assemblies used in this work.**

| <b>Species</b>                                  | <b>Genome assembly reference</b> | <b>Information was included in:</b> |
|-------------------------------------------------|----------------------------------|-------------------------------------|
| <i>Sugiyamaella lignohabitans</i> CBS10342      | ASM164002v2                      | Figure 1B                           |
| <i>Wickerhamiella galacta</i> NRRL Y-17645      | ASM304524v1                      | Figure 1B, Figure 2, Figure 4       |
| <i>Wickerhamiella hasegawae</i> JCM 12559       | ASM412510v1                      | Figure 1B                           |
| <i>Wickerhamiella pararugosa</i> NRRL Y-17089   | ASM412523v1                      | Figure 1B                           |
| <i>Wickerhamiella occidentalis</i> NRRL Y-27364 | ASM412509v1                      | Figure 1B                           |
| <i>Wickerhamiella sorbophila</i> DS02           | ASM225199v2                      | Figure 1B                           |
| <i>Wickerhamiella versatilis</i> JCM 5958       | JCM_5958_assembly_v001           | Figure 1B, Figure 2, Figure 3       |
| <i>Wickerhamiella domercqiae</i> PYCC 3067      | ASM303370v1                      | Figure 1B, Figure 2, Figure 3       |
| <i>Starmerella sorbosivorans</i> CBS 8768       | ASM412500v1                      | Figure 1B, Figure 2, Figure 3       |
| <i>Candida magnoliae</i> PYCC 2903              | ASM303343v1                      | Figure 1B, Figure 2, Figure 3       |
| <i>Starmerella bacillaris</i> PYCC 3044         | ASM303376v1                      | Figure 1B, Figure 2, Figure 3       |
| <i>Starmerella apicola</i> NRRL Y-50540         | ASM100541v1                      | Figure 1B, Figure 2, Figure 3       |
| <i>Starmerella ratchamatensis</i> CBS 10611     | ASM412497v1                      | Figure 1B, Figure 2, Figure 3       |
| <i>Starmerella riodocensis</i> NRRL Y-27859     | ASM412495v1                      | Figure 1B, Figure 2, Figure 3       |
| <i>Starmerella bombicola</i> PYCC 5882          | ASM303378v1                      | Figure 1B, Figure 2, Figure 3       |
| <i>Dysgonomonas mossii</i> DSM22836             | ASM37640v1                       | Figure 2                            |
| <i>Mangrovibacterium marinum</i> DSM 28823      | ASM304662v1                      | Figure 2                            |
| <i>Caballeronia udeis</i> ES_PA-B7              | ASM361007v1                      | Figure 2                            |
| <i>Burkholderia novacaledonica</i> LMG 28615T   | LMG28615                         | Figure 2                            |
| <i>Peptostreptococcus russellii</i> RT-10B      | ASM301205v1                      | Figure 2                            |
| <i>Veillonella dispar</i> DORA_11               | GCA_000508585.1                  | Figure 2                            |

**Table S3.** Primers used for Real Time PCR. Efficiencies of each primer pair were calculated using five ten-fold DNA dilutions.

| Name                   | Sequence 5'-3'            | Purpose                                                                                              | Primer Efficiency (%) |
|------------------------|---------------------------|------------------------------------------------------------------------------------------------------|-----------------------|
| qPCR_thiD_Fw           | AGATACTGATGGCACTCTCATCG   | primers for qRT-PCR of <i>thiD</i> from <i>St. bombicola</i>                                         | 101                   |
| qPCR_thiD_Rv           | GTGAAGTGGCCATGACCTC       | primers for qRT-PCR of <i>thiD</i> from <i>St. bombicola</i>                                         |                       |
| qPCR_thiE_Fw           | TTATGGCGTCGGAGCCTACC      | primers for qRT-PCR of <i>thiM</i> portion from <i>St. bombicola</i>                                 | 99,6                  |
| qPCR_thiE_Rv           | CGAGTAGTGGCTTCAGATGTGTC   | primers for qRT-PCR of <i>thiM</i> portion from <i>St. bombicola</i>                                 |                       |
| qPCR_thiEfim_Fw        | GAAGCGTCAAAGCAATTAGTGG    | primers for qRT-PCR of <i>thiE</i> portion from <i>St. bombicola</i>                                 | 92,5                  |
| qPCR_thiEfim_Rv        | CAGCTTTTGGGCTTCTGCCAG     | primers for qRT-PCR of <i>thiE</i> portion from <i>St. bombicola</i>                                 |                       |
| qPCR_tenA_Fw           | GCTGAGCAGGAATTGCACGAC     | primers for qRT-PCR of <i>tenA</i> from <i>St. bombicola</i>                                         | 94,5                  |
| qPCR_tenA_Rv           | GCGCATAGGGATGTTGACG       | primers for qRT-PCR of <i>tenA</i> from <i>St. bombicola</i>                                         |                       |
| qPCR_thiM718_Fw        | CAGTTGCTGGAGAGCTCGCTG     | primers for qRT-PCR of the fragment in between <i>thiM</i> and <i>thiE</i> from <i>St. bombicola</i> | 95,7                  |
| qPCR_thiE1024_Rv       | GGAACATGGAACATCGCATACC    | primers for qRT-PCR of the fragment in between <i>thiM</i> and <i>thiE</i> from <i>St. bombicola</i> |                       |
| qPCR_Pol2_Fw           | TGACGGCAGAGGCTATCTTGTCT   | primers for qRT-PCR of <i>POL2</i> from <i>St. bombicola</i>                                         | 94,1                  |
| qPCR_Pol2_Rv           | CGTAAACGCTAGCGATGACAGTGG  | primers for qRT-PCR of <i>POL2</i> from <i>St. bombicola</i>                                         |                       |
| qPCR_thiD_779Fw        | GTAGAGGTCATGCCCAGTTCA     | primers for qRT-PCR of the fragment in between <i>thiD</i> and <i>POL2</i> from <i>St. bombicola</i> | 94,5                  |
| qPCR_Pol2_82Rv         | TGGCATCAAACATGTCGGTCCAG   | primers for qRT-PCR of the fragment in between <i>thiD</i> and <i>POL2</i> from <i>St. bombicola</i> |                       |
| qPCR_Widcom_tenA334_Fw | CTAAGGTGTCTGCAGTTGAGC     | primers for qRT-PCR of <i>tenA</i> from <i>W. domercqiae</i>                                         | 94,8                  |
| qPCR_Widcom_tenA545Rv  | GTGGCTGCTGCAAGCTCATCG     | primers for qRT-PCR of <i>tenA</i> from <i>W. domercqiae</i>                                         |                       |
| qPCR_Widcom_thiD850Fw  | CTGGTGCCTTTGTCCAAGCTC     | primers for qRT-PCR of <i>thiD</i> from <i>W. domercqiae</i>                                         | 93,1                  |
| qPCR_Widcom_thiD1089Rv | TGCAAGCGAAATTAAGCGATCAGC  | primers for qRT-PCR of <i>thiD</i> from <i>W. domercqiae</i>                                         |                       |
| Widcom_thiM67Fw        | GCGGTAGCATCTAACTACGCTG    | primers for qRT-PCR of <i>thiM</i> portion from <i>W. domercqiae</i>                                 | 94,3                  |
| Widcom_thiM308Rv       | GCCACTAGAGCTCTGCATGTATC   | primers for qRT-PCR of <i>thiM</i> portion from <i>W. domercqiae</i>                                 |                       |
| Widcom_thiE1116Fw      | TCTTGACTCAGCGTGGGATC      | primers for qRT-PCR of <i>thiE</i> portion from <i>W. domercqiae</i>                                 | 97,4                  |
| Widcom_thiE1364Rv      | GCTACTCCAGCAGCACCTGTG     | primers for qRT-PCR of <i>thiE</i> portion from <i>W. domercqiae</i>                                 |                       |
| Widcom_thiM684Fw       | TGGTGTGCCGGTGAGCTTGC      | primers for qRT-PCR of the fragment in between <i>thiM</i> and <i>thiE</i> from <i>W. domercqiae</i> | 108,3                 |
| Widcom_thiE953Rv       | CTTGACCTCAACCGCGCAG       | primers for qRT-PCR of the fragment in between <i>thiM</i> and <i>thiE</i> from <i>W. domercqiae</i> |                       |
| Widcom_tenA518_Fw      | CATGCGATGAGCTTGACGACGC    | primers for qRT-PCR of the fragment in between <i>tenA</i> and <i>thiD</i> from <i>W. domercqiae</i> | 86,7                  |
| Widcom_thiD790_Rv      | CGTCTGAGAATACACTCCAAGCG   | primers for qRT-PCR of the fragment in between <i>tenA</i> and <i>thiD</i> from <i>W. domercqiae</i> |                       |
| Widcom_POL2_661Fw      | CGTCTCGCAATTGATCTTGATGTGC | primers for qRT-PCR of <i>POL2</i> from <i>W. domercqiae</i>                                         | 90,0                  |
| Widcom_POL2_915Rv      | CAATGCTCTGACTTAGCTCAGC    | primers for qRT-PCR of <i>POL2</i> from <i>W. domercqiae</i>                                         |                       |
| Widcom_tenAthiD_1451Fw | GCTGCGTGGATCAACAAGTGG     | primers for qRT-PCR of the fragment in between <i>thiD</i> and <i>POL2</i> from <i>W. domercqiae</i> | 94,4                  |
| Widcom_POL2_36Rv       | CGCGATGAAAGACGCGACGC      | primers for qRT-PCR of the fragment in between <i>thiD</i> and <i>POL2</i> from <i>W. domercqiae</i> |                       |
| Wgalacta_thiM266Fw     | GTCTCCATTCGTGCGGCCATTG    | primers for qRT-PCR of <i>thiM</i> portion from <i>W. galacta</i>                                    | 94,9                  |
| Wgalacta_ThiM485Rv     | CGTCTCAGAGCTAACAGCGC      | primers for qRT-PCR of <i>thiM</i> portion from <i>W. galacta</i>                                    |                       |
| Wgalacta_thiE312Fw     | GCTCGATGGTCTGGCAGAGAT     | primers for qRT-PCR of <i>thiE</i> portion from <i>W. galacta</i>                                    | 100,5                 |
| Wgalacta_thiE503Rv     | GCTTCAAGTTGACTACTGCCG     | primers for qRT-PCR of <i>thiE</i> portion from <i>W. galacta</i>                                    |                       |
| Wgalacta_thiD527Fw     | GGCATCTACCACAGACCTTACTAG  | primers for qRT-PCR of <i>thiD</i> from <i>W. galacta</i>                                            | 101,6                 |
| Wgalacta_thiD700Rv     | CCTTGACGGATTGTGCAAGGC     | primers for qRT-PCR of <i>thiD</i> from <i>W. galacta</i>                                            |                       |
| Wgalacta_thiM798Fw     | GGAGCAGCTGACTTTGAGCG      | primers for qRT-PCR of the fragment in between <i>thiM</i> and <i>thiE</i> from <i>W. galacta</i>    | 105,6                 |
| Wgalacta_thiE81Rv      | CGAGTGCCAGCTCTACGTCG      | primers for qRT-PCR of the fragment in between <i>thiM</i> and <i>thiE</i> from <i>W. galacta</i>    |                       |
| Wgalacta_thiE312Fw     | GCTCGATGGTCTGGCAGAGAT     | primers for qRT-PCR of the fragment in between <i>thiD</i> and <i>thiE</i> from <i>W. galacta</i>    | 92,5                  |
| Wgalacta_thiD105Rv     | CACGCTGAGACCATAAGCTCC     | primers for qRT-PCR of the fragment in between <i>thiD</i> and <i>thiE</i> from <i>W. galacta</i>    |                       |
| Wgalacta_thiD750Fw     | TGTAGGTCATGGAAGTGGTCCG    | primers for qRT-PCR the fragment between <i>thiD</i> and uridine kinase from <i>W. galacta</i>       | 116,9                 |
| Wgalacta_uridineRv     | GCCACTCCCTGAACATCCAGC     | primers for qRT-PCR the fragment between <i>thiD</i> and uridine kinase from <i>W. galacta</i>       |                       |

**Table S4.** Primers used for the disruption of *THI* genes in *St. bombycola* PYCC 5882.

| Name                        | Sequence 5'-3'                   | Purpose                                                                   |
|-----------------------------|----------------------------------|---------------------------------------------------------------------------|
| thiE_upNotI_Fw              | TATCATGCGGCCGCGTGATACCTGGCATCAG  | Amplification of the upstream and downstream regions of thiEM             |
| thiE_downNcoI_Rv            | ATGATACCATGGGGATTCCAGCACCTCC     |                                                                           |
| thiE_transf_Fw              | TGAGTGGATTCTCAGGATC              | Amplification of final construction for thiEM deletion                    |
| thiE_transf_Rv              | GGCAATGGAAAGTGCTG                |                                                                           |
| tenAthiD_upstreamSphI_Fw    | CGGGCACGATGCATTC                 | Amplification of the upstream and downstream regions of thiD              |
| tenAthiD_downstream_KpnI_Rv | ATGATAGGTACCCACAGGTTGTGCACGC     |                                                                           |
| thiD_transf_Fw              | TAGCTCTCATTGCTGCC                | Amplification of final construction for thiD deletion                     |
| thiD_transf_Rv              | AATTAGATCGCGACGCGT               |                                                                           |
| tenAKO_KpnI_Rv              | GACTTAGGTACCGAGTGCCATCAGTATCTTC  | Amplification of the upstream and downstream regions of tenA              |
| tenA_603_SmaI_Fw            | GACTTACCCGGGGATGACCGAGGCATTTGT   |                                                                           |
| tenA_transf_Fw              | GGTTACAGATCCAGAGC                | Amplification of final construction for tenA deletion                     |
| tenA_transf_Rv              | GAGTGCCATCAGTATCTTC              |                                                                           |
| thiE_upNotI_Fw              | TATCATGCGGCCGCGTGATACCTGGCATCAG  | Amplification of the upstream and downstream regions of the entire operon |
| tenAthiD_downNotI_Rv        | ATGATAGCGGCCGCTCACGAGCATATGGAGTC |                                                                           |
| thiE_transf_Fw              | TGAGTGGATTCTCAGGATC              | Amplification of final construction for the deletion of the entire operon |
| THlope_transf_Rv            | CTTCGCTACCGATATCG                |                                                                           |

## References

1. W. Li, A. Godzik, Cd-hit: a fast program for clustering and comparing large sets of protein or nucleotide sequences. *Bioinformatics (Oxford, England)* **22**, 1658-1659 (2006).
2. K. Katoh, D. M. Standley, MAFFT: iterative refinement and additional methods. *Methods in molecular biology (Clifton, N.J.)* **1079**, 131-146 (2014).
3. S. Capella-Gutierrez, J. M. Silla-Martinez, T. Gabaldon, trimAl: a tool for automated alignment trimming in large-scale phylogenetic analyses. *Bioinformatics (Oxford, England)* **25**, 1972-1973 (2009).
4. L.-T. Nguyen, H. A. Schmidt, A. von Haeseler, B. Q. Minh, IQ-TREE: A Fast and Effective Stochastic Algorithm for Estimating Maximum-Likelihood Phylogenies. *Molecular biology and evolution* **32**, 268-274 (2015).
5. D. T. Hoang, O. Chernomor, A. von Haeseler, B. Q. Minh, L. S. Vinh, UFBoot2: Improving the Ultrafast Bootstrap Approximation. *Molecular biology and evolution* **35**, 518-522 (2017).
6. A. H. Jenkins, G. Schyns, S. Potot, G. Sun, T. P. Begley, A new thiamin salvage pathway. *Nature chemical biology* **3**, 492-497 (2007).
7. C. Goncalves *et al.*, Evidence for loss and reacquisition of alcoholic fermentation in a fructophilic yeast lineage. *eLife* **7** (2018).
8. I. Letunic, P. Bork, Interactive Tree Of Life (iTOL) v4: recent updates and new developments. *Nucleic Acids Res* **47**, W256-w259 (2019).
